## CORRECTION

# Correction: RDH10-mediated retinol metabolism and RAR $\alpha$ -mediated retinoic acid signaling are required for submandibular salivary gland initiation (doi: 10.1242/dev.164822)

**Melissa A. Metzler, Swetha Raja, Kelsey H. Elliott, Regina M. Friedl, Nhut Quang Huy Tran, Samantha A. Brugmann, Melinda Larsen and Lisa L. Sandell**

An error was published in *Development* (2018) **145**, dev164822 (doi: 10.1242/dev.164822)

An author's name was published incorrectly in the version of the article published on 2 August 2018. The correct name appears above, and the online and print versions have been updated.

We apologise to the authors and readers for this mistake.
